# Supplementary material for: Single‐cell transcriptomics uncovers an instructive T‐cell receptor role in adult γδ T‐cell lineage commitment
Source: PubMed Central journal article supplement (PMC8886544; doi:10.15252/embj.2021110023), 2022-02-07
Supplement: EMBJ-41-e110023-s002.pdf [file EMBJ-41-e110023-s002.pdf]

## Expanded View Figures

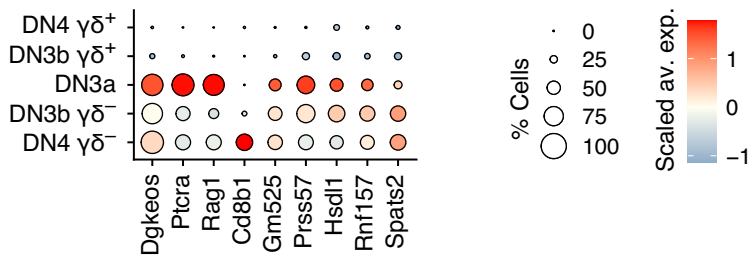

**Figure EV1. Transcriptional footprint of pre-TCR selection.**

Dot plot showing the expression level of genes characterizing the “pre-TCR-induced” signature among the DN3a, DN3b  $\gamma\delta^+$ , DN4  $\gamma\delta^+$ , DN3b  $\gamma\delta^-$ , and DN4  $\gamma\delta^-$  sorted subsets of Dataset 1. The “pre-TCR-induced” signature was obtained by analyzing the genes differentially expressed between the DN3b  $\gamma\delta^-$ /DN4  $\gamma\delta^-$  and DN3b  $\gamma\delta^+$  sorted samples and by selecting the genes upregulated in DN3b  $\gamma\delta^-$ /DN4  $\gamma\delta^-$  subset (adjusted  $P$ -value = 0 and expressed in < 25% of the DN3b  $\gamma\delta^+$  cells). A fully identical gene list was generated when a  $P$ -value < 0.01 was used.

**Figure EV2. Expression of the  $\gamma\delta$  TCR-induced signature across the whole sequence of intrathymic T-cell development.**

- Schematic representation of the workflow used for scRNAseq analysis of total thymocytes and DN-enriched thymocytes and the generation of Dataset 2.
- UMAP plots of the cells corresponding to Dataset 2 and colored according to the defined clusters.
- Dot plot showing the expression level of selected genes among the eight cell clusters identified in Dataset 2. Dot color represents the scaled average expression of the gene of interest across the various clusters, whereas dot size indicates the percentage of cells expressing the specified gene.
- Violin plots showing AUCell scores of the  $\gamma\delta$  TCR-induced (top),  $\gamma\delta$  TCR-only signature (middle), and the “ $\alpha\beta$  and  $\gamma\delta$  TCR shared” (bottom) signatures among the specified subsets.

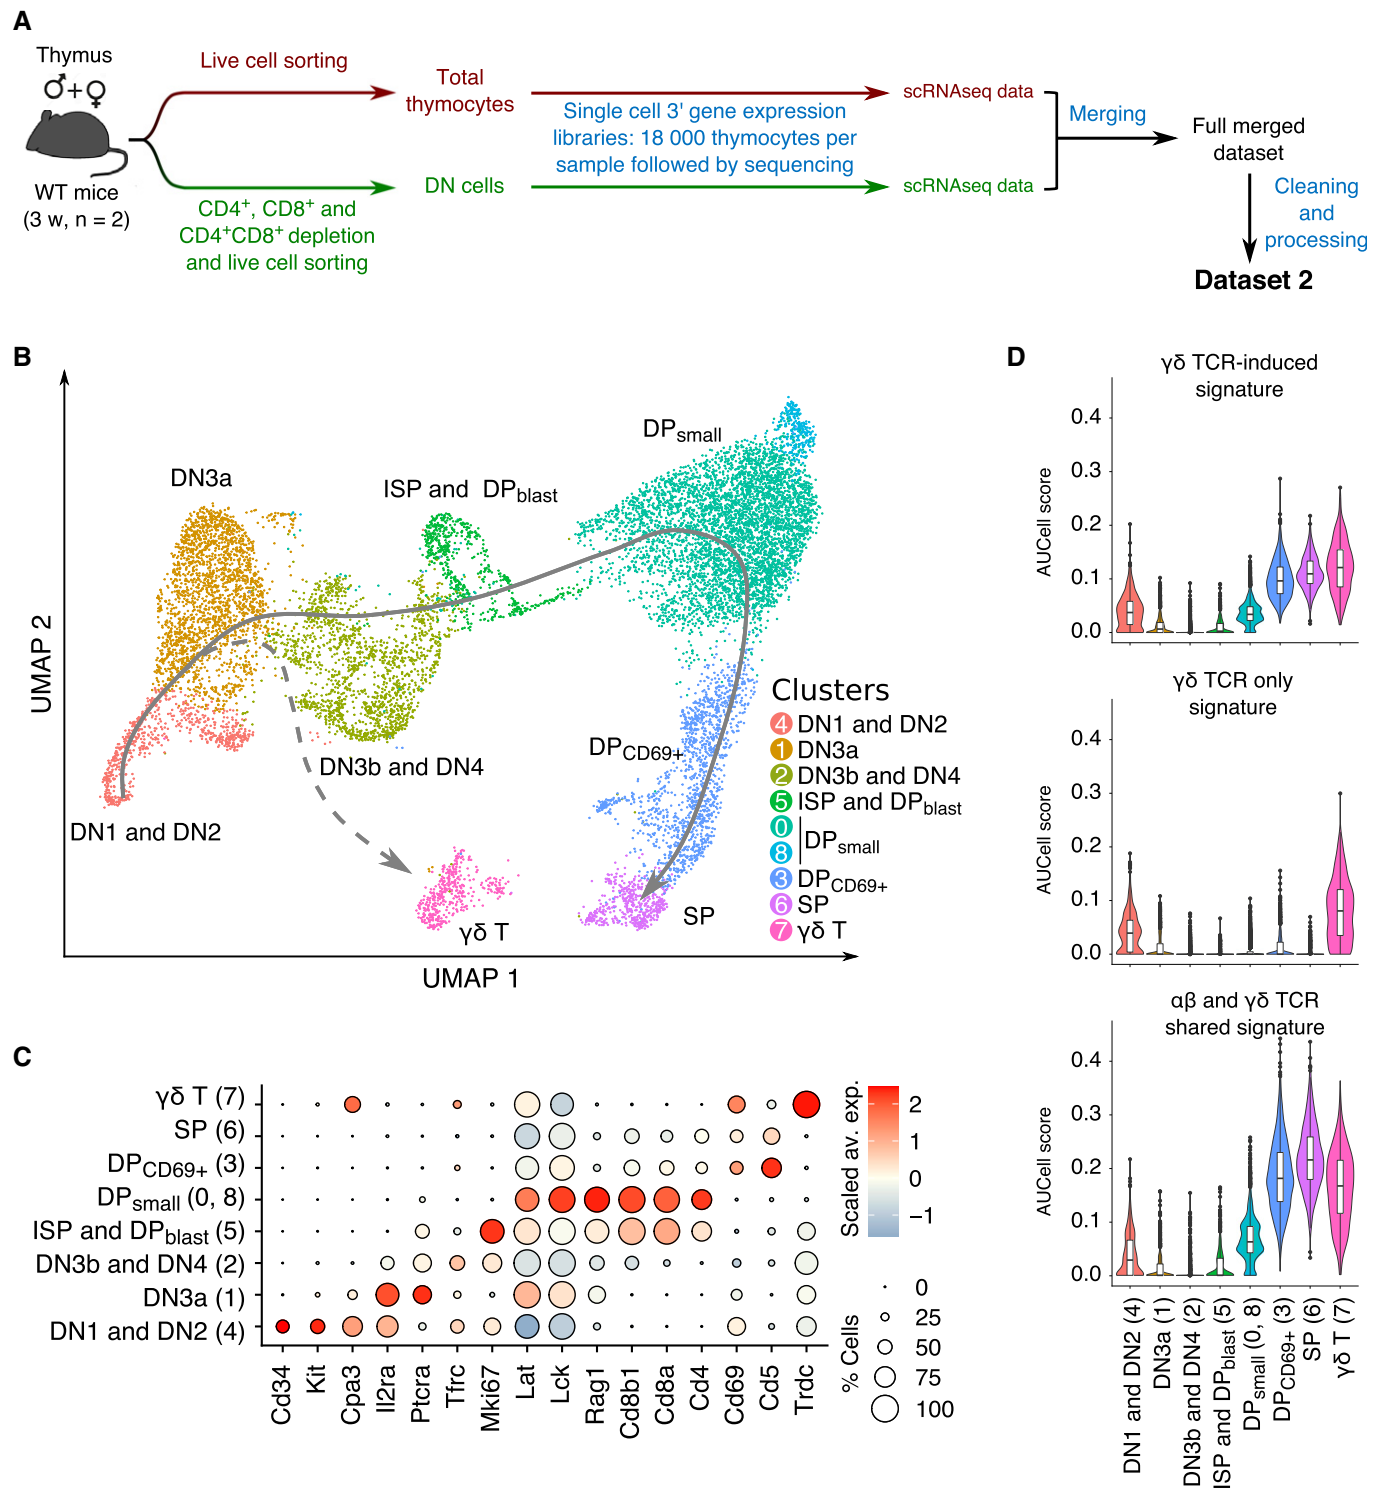

Figure EV2.

**Figure EV3. Analysis of the genes that are differentially expressed during the DP<sub>small</sub> → DP<sub>CD69+/SP</sub> transition.**

- A Dot plot showing the expression level of the top genes which are upregulated during the DP<sub>small</sub> → DP<sub>CD69+/SP</sub> transition among the eight cell clusters identified in Dataset 2 (genes shown are expressed in < 25% of DP<sub>small</sub> cell, have a *P*-value = 0 and a log fold change > 0). Dot color represents the scaled average expression of the specified genes across the eight cell clusters, whereas dot size indicates the percentage of cells expressing the specified gene.
- B The table summarized the results of differential gene expression analysis of DP<sub>small</sub> → DP<sub>CD69+/SP</sub> transition using a Wilcoxon rank sum test (Seurat FindMarkers function used with default parameters). Only the genes corresponding to the  $\gamma\delta$  TCR-induced signature are shown. The average log fold change (FC) corresponds to the log fold change of the average expression between the two groups. Positive values indicate that the gene is more highly expressed in the DP<sub>CD69+/SP</sub> group. The pct.1 DP<sub>CD69+/SP</sub> and pct.2 DP<sub>small</sub> values correspond to the percentage of DP<sub>CD69+/SP</sub> and DP<sub>small</sub> cells where the gene is detected, respectively. Adjusted *P*-value (*p\_val\_adj*) is based on Bonferroni correction using all genes in the dataset. The genes not differentially expressed are denoted as "NA" (not available). Accordingly, the  $\gamma\delta$  TCR-induced signature can be divided into two gene sets: gene set #1 consists of genes that are not upregulated in DP<sub>CD69+/SP</sub> cells and gene set #2 consists of genes upregulated in DP<sub>CD69+/SP</sub> cells. *P*-values are indicated for both gene sets. Therefore, gene set #1 was defined as the " $\gamma\delta$  TCR only" signature and gene set #2 as the " $\alpha\beta$  and  $\gamma\delta$  TCR shared" signature.

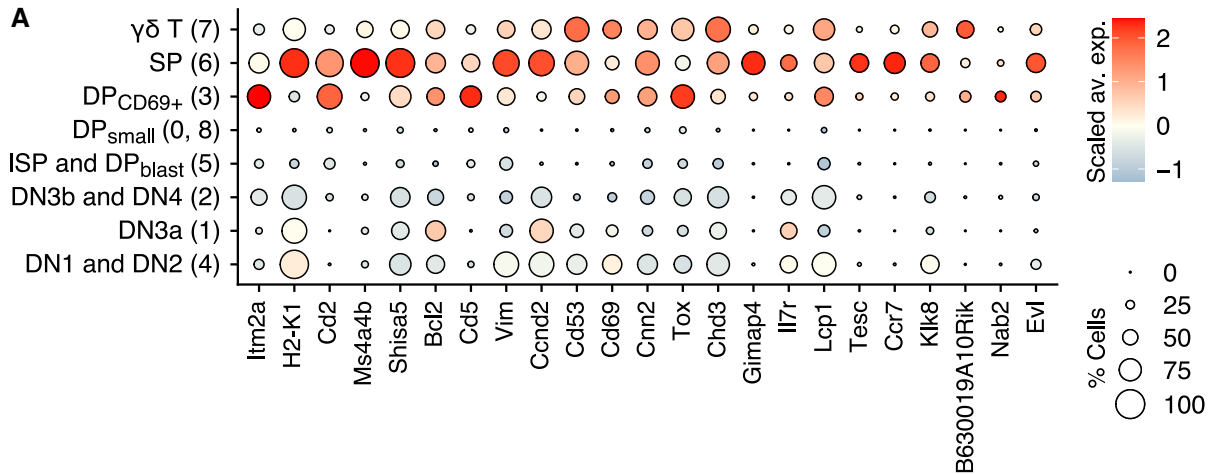

**B**

| Genes of $\gamma\delta$ TCR-induced signature | p_val     | avg_logFC | Pct.1<br>'DP <sub>CD69+</sub> /SP' | Pct.2<br>'DP <sub>small</sub> ' | p_val_adj |
|-----------------------------------------------|-----------|-----------|------------------------------------|---------------------------------|-----------|
| Sox13                                         | NA        | NA        | NA                                 | NA                              | NA        |
| Etv5                                          | NA        | NA        | NA                                 | NA                              | NA        |
| Blk                                           | NA        | NA        | NA                                 | NA                              | NA        |
| Tuba8                                         | NA        | NA        | NA                                 | NA                              | NA        |
| Tox2                                          | NA        | NA        | NA                                 | NA                              | NA        |
| Gem                                           | NA        | NA        | NA                                 | NA                              | NA        |
| Mpp4                                          | NA        | NA        | NA                                 | NA                              | NA        |
| Nrgn                                          | NA        | NA        | NA                                 | NA                              | NA        |
| Scin                                          | NA        | NA        | NA                                 | NA                              | NA        |
| BC035044                                      | NA        | NA        | NA                                 | NA                              | NA        |
| Bex6                                          | NA        | NA        | NA                                 | NA                              | NA        |
| Rbpms                                         | NA        | NA        | NA                                 | NA                              | NA        |
| Cpa3                                          | NA        | NA        | NA                                 | NA                              | NA        |
| Coro2a                                        | NA        | NA        | NA                                 | NA                              | NA        |
| Cd160                                         | NA        | NA        | NA                                 | NA                              | NA        |
| Ccl4                                          | NA        | NA        | NA                                 | NA                              | NA        |
| Gstp1                                         | NA        | NA        | NA                                 | NA                              | NA        |
| Basp1                                         | NA        | NA        | NA                                 | NA                              | NA        |
| Ppp1r16b                                      | NA        | NA        | NA                                 | NA                              | NA        |
| Igfbp4                                        | 5.04e-152 | 0.649     | 0.159                              | 0.008                           | 9.45e-148 |
| Trac                                          | 1.59e-185 | 0.578     | 0.952                              | 0.629                           | 2.98e-181 |
| Cd52                                          | 3.99e-186 | 0.727     | 0.953                              | 0.855                           | 7.48e-182 |
| Cd53                                          | 0.00e+00  | 1.151     | 0.594                              | 0.032                           | 0.00e+00  |
| Cd5                                           | 0.00e+00  | 1.373     | 0.686                              | 0.103                           | 0.00e+00  |
| Cd6                                           | 3.09e-161 | 0.621     | 0.525                              | 0.181                           | 5.78e-157 |
| Arap2                                         | 3.68e-64  | 0.345     | 0.481                              | 0.240                           | 6.90e-60  |
| Egr1                                          | 2.94e-202 | 0.771     | 0.262                              | 0.027                           | 5.51e-198 |
| Nab2                                          | 0.00e+00  | 0.686     | 0.292                              | 0.006                           | 0.00e+00  |
| Nr4a1                                         | 1.35e-140 | 0.682     | 0.168                              | 0.014                           | 2.53e-136 |
| Pdcd1                                         | 5.93e-120 | 0.365     | 0.112                              | 0.003                           | 1.11e-115 |
| St6gal1                                       | 2.05e-102 | 0.277     | 0.178                              | 0.029                           | 3.84e-98  |
| B630019A10Rik                                 | 0.00e+00  | 0.705     | 0.336                              | 0.011                           | 0.00e+00  |
| Tes                                           | 6.89e-257 | 0.590     | 0.405                              | 0.062                           | 1.29e-252 |
| Izumo1r                                       | 4.81e-231 | 0.670     | 0.229                              | 0.009                           | 9.01e-227 |
| Itgb2                                         | 1.77e-100 | 0.312     | 0.511                              | 0.205                           | 3.319e-96 |
| Clec2d                                        | 1.42e-285 | 0.727     | 0.547                              | 0.119                           | 2.66e-281 |
| Sesn3                                         | 5.59e-104 | 0.280     | 0.308                              | 0.087                           | 1.05e-99  |
| Klf2                                          | 5.09e-268 | 1.111     | 0.343                              | 0.040                           | 9.53e-264 |

DP<sub>CD69+</sub>/SP versus DP<sub>small</sub>

Non-differentially expressed genes (Gene set #1)

Differentially expressed genes (Gene set #2)

Figure EV3.

**Figure EV4. Workflow used for scRNAseq analysis of DN3  $\gamma\delta^-$  and  $\gamma\delta^{\text{int}}$  cells from  $Lat^{-/-}$  thymus.**

- A Flow cytometry plots showing EGFP and surface TCR  $\gamma\delta$  expression in DN1, DN2, DN3, and DN4 subsets from *Trdc-H2BEGFP* (top panels) and  $Lat^{-/-} \times Trdc-H2BEGFP$  (bottom panels) mice. Note that the TCR  $\gamma\delta^+$  cells corresponding to the DN1 stage correspond to mature  $\gamma\delta$  T cells that present a CD127<sup>hi</sup> phenotype and they were thus excluded from the analysis.
- B Schematic representation of the workflow used for scRNAseq analysis of DN3  $\gamma\delta^-$  and DN3  $\gamma\delta^{\text{int}}$  cells from thymus ( $n = 30$ ) of  $Lat^{-/-} \times Trdc-H2BEGFP$  mice and the generation of Dataset 3. Two single-cell 3' gene expression libraries containing 18,000 thymocytes and 500 spike-in B cells were constructed and individually sequenced.
- C FACS plots showing the gating strategy used to sort DN3  $\gamma\delta^-$  and DN3  $\gamma\delta^{\text{int}}$  cells from  $Lat^{-/-} \times Trdc-H2BEGFP$  mice. Numbers indicate percentages of cells found in each of the specified gates.

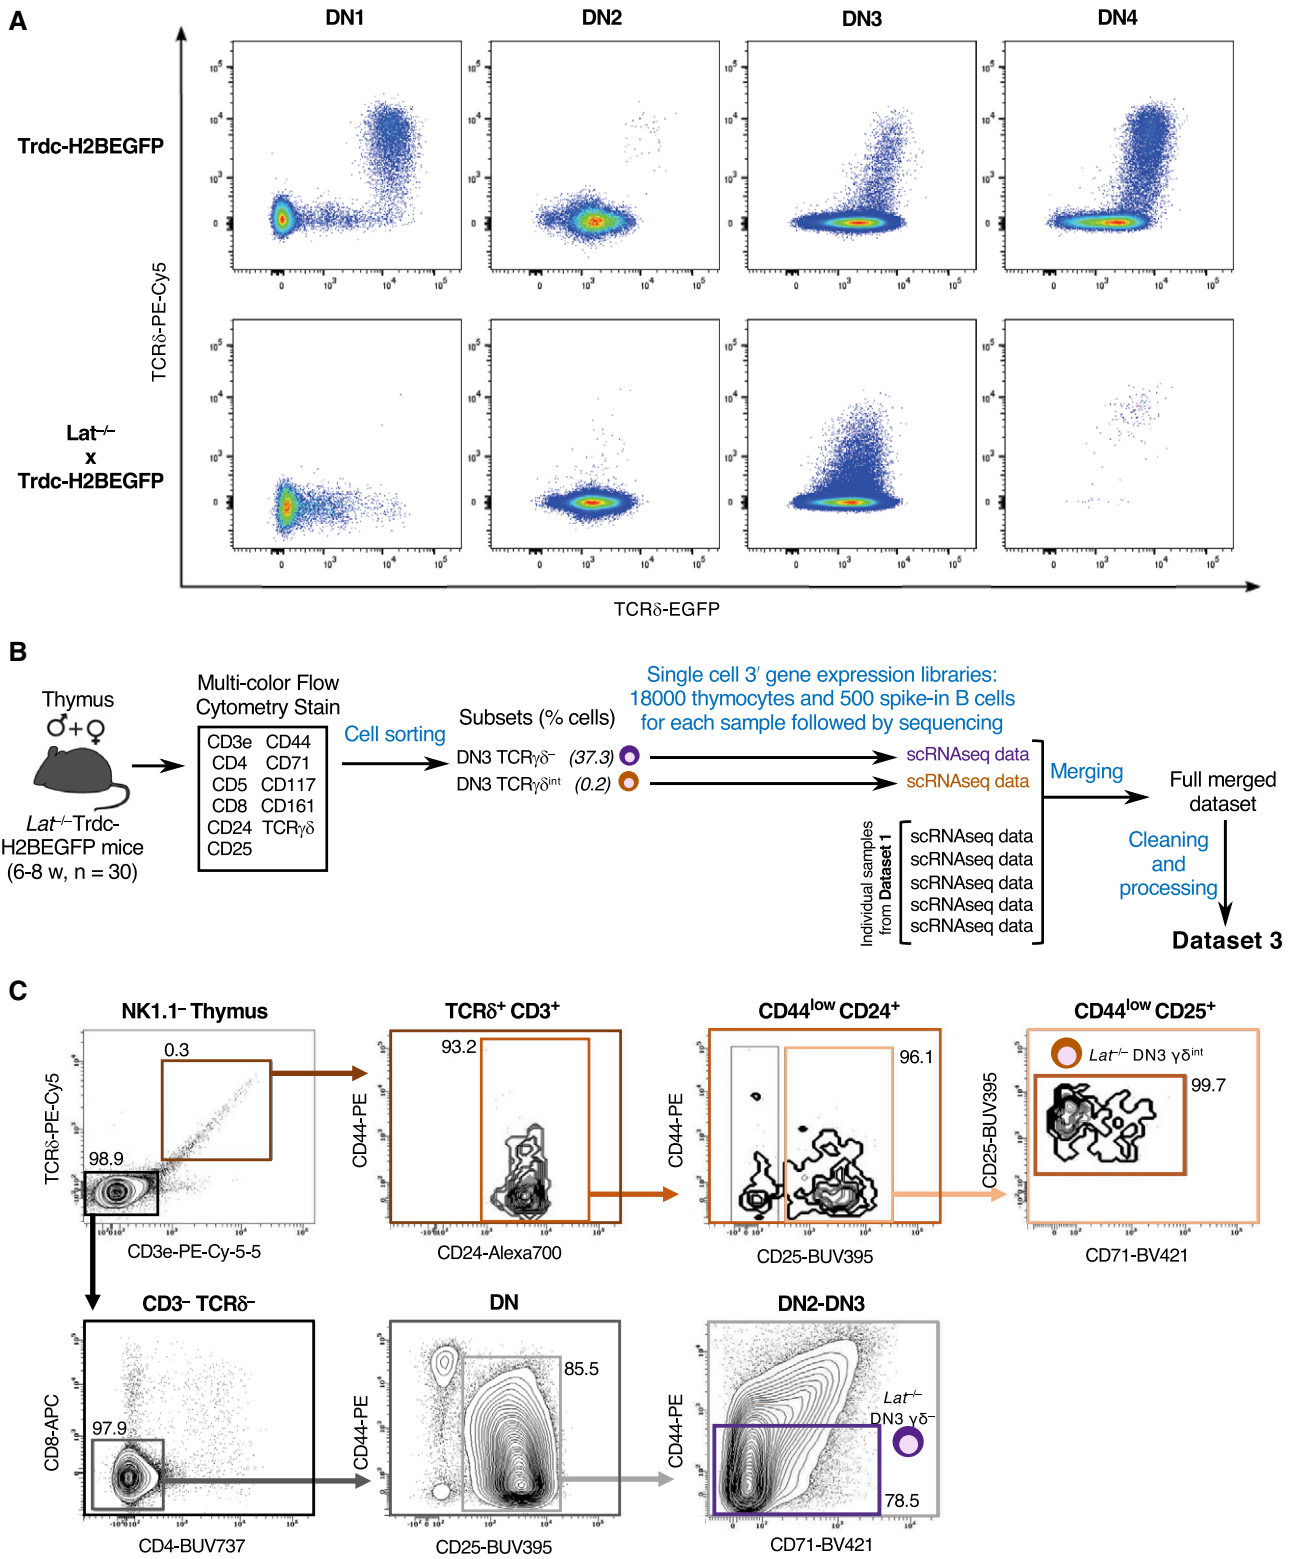

Figure EV4.
