# Supplementary material for: Single‐cell transcriptomics uncovers an instructive T‐cell receptor role in adult γδ T‐cell lineage commitment
Source: PubMed Central journal article supplement (PMC8886544; doi:10.15252/embj.2021110023), 2022-02-07
Supplement: EMBJ-41-e110023-s003.pdf [file EMBJ-41-e110023-s003.pdf]

## Appendix

**Appendix Figure S1.** Distribution of the cells present in each of the 11 cell clusters identified in DN3a, DN3b  $\gamma\delta^+$  and DN4  $\gamma\delta^+$  cells according to the G0/G1, S and G2/M phases of the cell cycle

**Appendix Figure S2:** Expression of CD71 on *Lat*<sup>-/-</sup> DN3  $\gamma\delta^{\text{int}}$  cells.

**Appendix Table S1:** Table of antibodies used for flow cytometry analysis and FACS sorting.

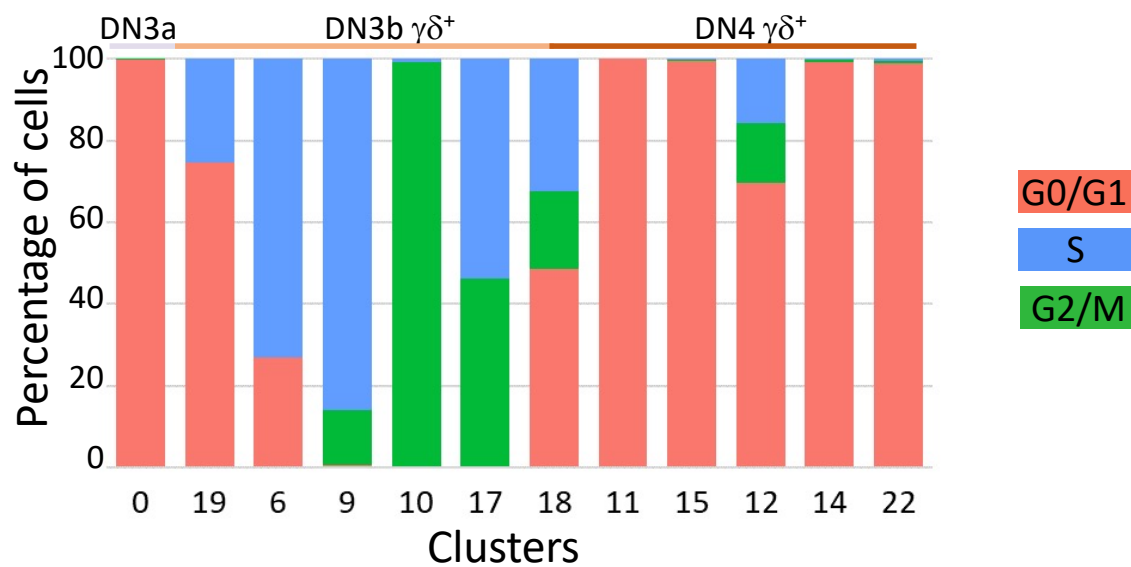

**Appendix Figure S1. Distribution among the G0/G1, S and G2/M phases of the cell cycle of the cells present in each of the 11 cell clusters identified in DN3a, DN3b  $\gamma\delta^+$  and DN4  $\gamma\delta^+$  cells.** The bar plot shows for each of the 11 cells clusters identified among DN3a, DN3b  $\gamma\delta^+$  and DN4  $\gamma\delta^+$  cells (see Fig 3A) the percentage of cells found in the G0/G1, S and G2/M phases of the cell cycle

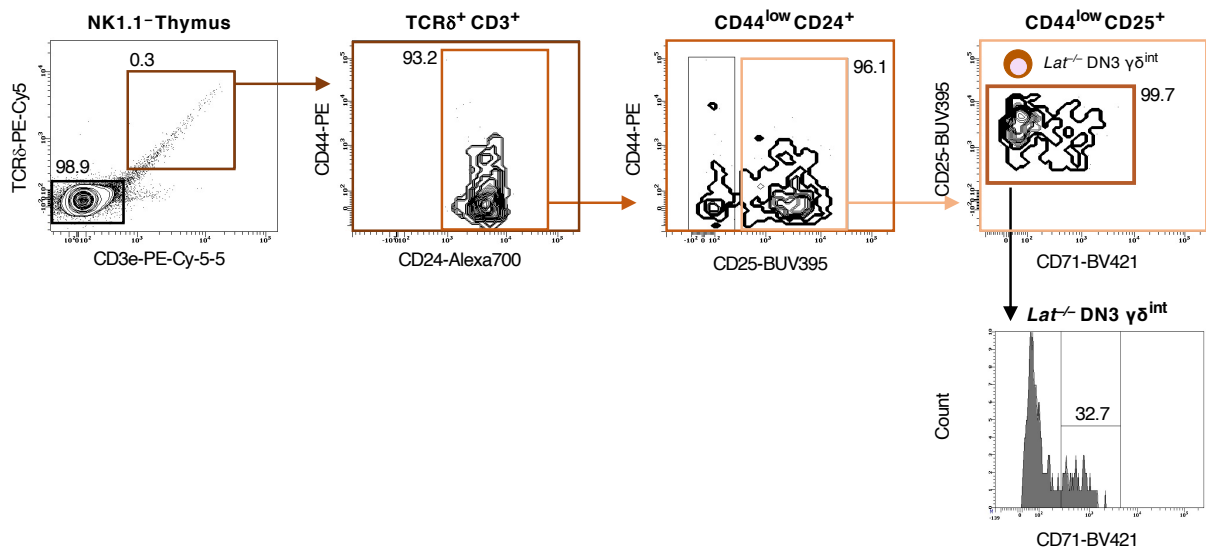

**Appendix Figure S2 : Expression of CD71 on *Lat*<sup>-/-</sup> DN3 γδ<sup>int</sup> cells.** FACS plots showing the gating strategy used to sort DN3 γδ<sup>int</sup> populations from *Lat*<sup>-/-</sup>-TCRd-H2BEGFP mice. A histogram shows the expression of CD71 on the sorted subset DN3 γδ<sup>int</sup> *Lat*<sup>-/-</sup>.

**Appendix Table S1** : Table of antibodies used for flow cytometry analysis and FACS sorting.

| Antigen | Fluorochrome | Clone       | Company        | Cat Number | RRID        | Immunophenotyping | Cell Sorting : Thymic cells | Cell Sorting : B cells | Depletion validation |
|---------|--------------|-------------|----------------|------------|-------------|-------------------|-----------------------------|------------------------|----------------------|
| CD3e    | BB700        | 145-2C11    | BD Biosciences | 745836     | AB_2743282  | ✓                 | ✓                           | ✗                      | ✗                    |
| CD4     | BUV737       | RM4-5       | BD Biosciences | 564933     | AB_2732918  | ✓                 | ✓                           | ✗                      | ✗                    |
| CD4     | BV421        | RM4-5       | BD Biosciences | 740007     | AB_2739779  | ✗                 | ✗                           | ✗                      | ✓                    |
| CD5     | PE-Cy7       | 53-7.3      | Biologend      | 100622     | AB_2562773  | ✓                 | ✓                           | ✗                      | ✗                    |
| CD8a    | APC          | 53-6.7      | BD Biosciences | 553035     | AB_398527   | ✗                 | ✓                           | ✗                      | ✗                    |
| CD8a    | BV650        | 53-6.7      | BD Biosciences | 563234     | AB_2738084  | ✓                 | ✗                           | ✗                      | ✗                    |
| CD8a    | PE           | 53-7.3      | BD Biosciences | 561095     | AB_2034011  | ✗                 | ✗                           | ✗                      | ✓                    |
| CD8b    | PE           | H35-17.2    | BD Biosciences | 550798     | AB_393887   | ✗                 | ✗                           | ✗                      | ✓                    |
| CD19    | APC-Cy7      | 1D3         | BD Biosciences | 557655     | AB_396770   | ✗                 | ✗                           | ✓                      | ✗                    |
| CD24    | A700         | M1/69       | Biologend      | 564237     | AB_2738691  | ✓                 | ✓                           | ✗                      | ✗                    |
| CD25    | BUV395       | PC61        | BD Biosciences | 564022     | AB_2722574  | ✓                 | ✓                           | ✗                      | ✗                    |
| CD27    | PE-Cy7       | LG.3A10     | BD Biosciences | 558754     | AB_397106   | ✓                 | ✗                           | ✗                      | ✗                    |
| CD44    | APC          | IM7         | Biologend      | 103012     | AB_312963   | ✓                 | ✗                           | ✗                      | ✗                    |
| CD44    | PE           | IM7         | BD Biosciences | 553134     | AB_394649   | ✗                 | ✓                           | ✗                      | ✗                    |
| CD69    | BV605        | H1.2F3      | BD Biosciences | 563290     | AB_2738120  | ✓                 | ✓                           | ✗                      | ✗                    |
| CD71    | BV421        | RI7217      | Biologend      | 113813     | AB_10899739 | ✓                 | ✓                           | ✗                      | ✗                    |
| CD117   | PE-CF594     | 2B8         | BD Biosciences | 562417     | AB_11154233 | ✓                 | ✓                           | ✗                      | ✗                    |
| CD161   | BV650        | PK136       | BD Biosciences | 564143     | AB_2738617  | ✗                 | ✓                           | ✗                      | ✗                    |
| CD161   | APC-Cy7      | PK136       | BD Biosciences | 560618     | AB_1727569  | ✓                 | ✗                           | ✗                      | ✗                    |
| IA-IE   | V500         | M5/114.15.2 | BD Biosciences | 562366     | AB_11153488 | ✗                 | ✗                           | ✓                      | ✗                    |
| TCRd    | PE-Cy5       | GL-3        | Invitrogen     | 15-5711-82 | AB_468804   | ✓                 | ✓                           | ✗                      | ✗                    |

- ✓ Antibody used in the experiment  
 ✗ Antibody not used in the experiment
